# Supplementary material for: Mastering DNA Content Estimation by Flow Cytometry as an Efficient Tool for Plant Breeding and Biodiversity Research
Source: MDPI journal article supplement (doi:10.3390/mps6010018), 2023-02-12
Supplement: s1 [file s1]

## Supplementary material

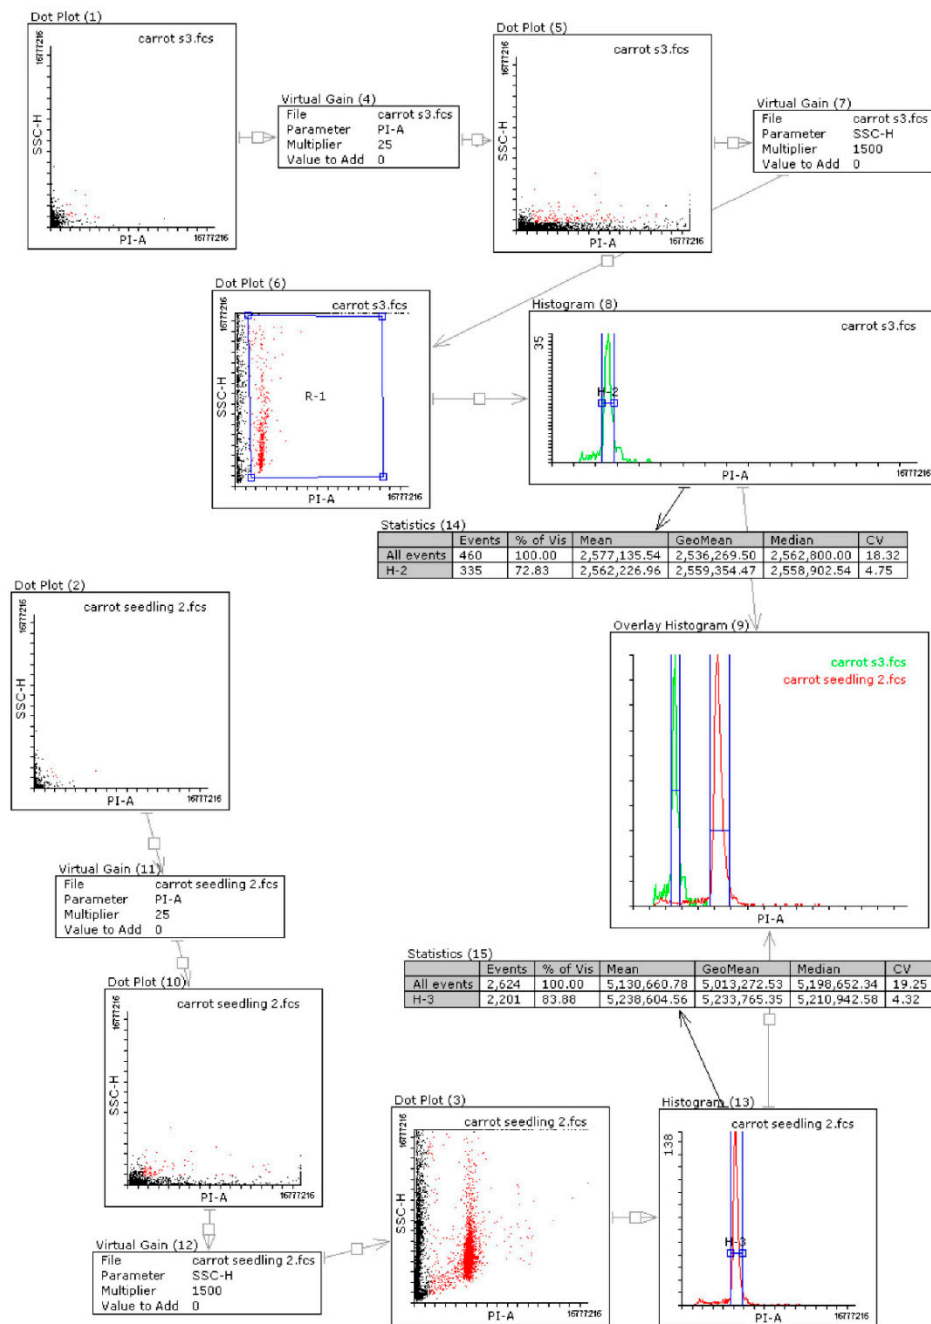

**Figure S1.** Flowing software DNA content analysis workflow.

Nuclei from control carrot seedlings (2x) and regenerants produced by doubled haploid technology were isolated and stained with PI. Regenerant data (dot plot (1)) were stretched along X and Y axis (Virtual gain (4) and (7), respectively) to produce Dot plot (6). Nucleus population was manually gated (R1 gate). Histogram (8) is produced to visualize nuclear peak. The peak was manually gated (H2). Statistics table with Mean and CV data was produced. The same was performed for control sample (dot plot (2)). Control and regenerant sample histograms were overlaid for better visualization (Overlay histogram (9)). Regenerant ploidy = Control ploidy  $\times$  Mean<sub>Regenerant</sub> / Mean<sub>control</sub> =  $2n \times 2562226,96 / 5238604,56 = 0.978n$ . Hence, the regenerant plant is haploid.

**Table S1.** Otto I buffer recipe [23,24]. It is used for the nucleus isolation step.

| Component        | Final concentration | Amount to add |
|------------------|---------------------|---------------|
| Citric acid      | 0.1 M               | 2.58 g        |
| Tween 20         | 0.5%                | 500 $\mu$ L   |
| H <sub>2</sub> O |                     | Up to 100 mL  |

pH 2-3, no adjustment needed

**Table S2.** Otto II buffer recipe [23,24]. It is added to Otto I buffer with isolated nuclei for DNA staining step (DNA dye is added to Otto II or to the mixture of Otto buffers).

| Component                                              | Final concentration | Amount to add |
|--------------------------------------------------------|---------------------|---------------|
| Na <sub>2</sub> HPO <sub>4</sub> × 12 H <sub>2</sub> O | 0.4 M               | 5.68 g        |
| H <sub>2</sub> O                                       |                     | Up to 100 mL  |

pH 8-9, no adjustment needed

**Table S3.** LB01 buffer [25].

| Component            | Final concentration | Amount to add |
|----------------------|---------------------|---------------|
| Tris                 | 15 mM               | 0.1815 g      |
| Na <sub>2</sub> EDTA | 2 mM                | 0.0584 g      |
| Spermine 4HCl        | 0.5 mM              | 0.0174 g      |
| KCl                  | 80 mM               | 0.6 g         |
| NaCl                 | 20 mM               | 0.116 g       |
| Triton X-100         | 0.1%                | 100 $\mu$ L   |
| H <sub>2</sub> O     |                     | Up to 100 mL  |

pH 8.0

**Table S4.** Galbraith buffer [6].

| Component         | Final concentration | Amount to add |
|-------------------|---------------------|---------------|
| MgCl <sub>2</sub> | 45 mM               | 0.045 g       |
| MOPS              | 20 mM               | 0.418 g       |
| Sodium citrate    | 30 mM               | 0.774 g       |
| Triton X-100      | 0.1%                | 100 $\mu$ L   |
| H <sub>2</sub> O  |                     | Up to 100 mL  |

pH 7.0

**Table S5.** Tris-MgCl<sub>2</sub> buffer [26].

| Component                             | Final concentration | Amount to add |
|---------------------------------------|---------------------|---------------|
| Tris                                  | 200 mM              | 2.42 g        |
| MgCl <sub>2</sub> × 6H <sub>2</sub> O | 4 mM                | 0.038 g       |
| Triton X-100                          | 0.5%                | 500 $\mu$ L   |

|                  |  |              |
|------------------|--|--------------|
| H <sub>2</sub> O |  | Up to 100 mL |
|------------------|--|--------------|

pH 7.5

**Table S6.** A variant of complete lysis buffer (prepared immediately before sample preparation)

| Component                                         | Final concentration | Amount to add |
|---------------------------------------------------|---------------------|---------------|
| Ascorbic acid (stock solution 100 mg/mL in water) | 0.2 mg/mL           | 20 µL         |
| RNase I (10 µg/mL)                                | 50 µg/mL            | 50 µL (1:200) |
| PI (stock solution 1 mg/mL in water)              | 50 µg/mL            | 500 µL (1:20) |
| Ice cold buffer                                   |                     | Up to 10 mL   |
